# Supplementary material for: Effects of Efficient Expression of Vitreoscilla Hemoglobin on Production, Monosaccharide Composition, and Antioxidant Activity of Exopolysaccharides in Ganoderma lucidum
Source: MDPI journal article supplement (doi:10.3390/microorganisms9081551), 2021-07-21
Supplement: s1 [file s1]

## Supplementary information

The synthesized *NheI*-intron-opvhb-*SmaI* sequence

GCTAGC **ATGCCCGTGAGTCCTGCATCCCCATCGTGCACCGTATTCACCTCAT**  
**CGTTTGGCCCCCTTCTCACAGGTCAAGGTC** ATGCTCGACCAGCAGACCATC  
AACATCATCAAGGCCACCGTCCCCGTCTCAAGGAGCACGGCGTCACCATC  
ACCACCACCTTCTACAAGAACCTCTTCGCCAAGCACCCCGAGGTCCGCCCC  
CTCTTCGACATGGGCCGCCAGGAGTCCCTCGAGCAGCCCAAGGCCCTCGC  
CATGACGGTCCTCGCGGCCGCCAGAACATCGAGAACCTCCCCGCCATCCT  
CCCCGCCGTCAAGAAGATCGCCGTCAAGCACTGCCAGGCCGGCGTCGCCG  
CCGCCCATACCCCATCGTCGGCCAGGAGCTCCTCGGCGCCATCAAGGAG  
GTCCTCGGCGACGCCGCCACCGACGACATCCTCGACGCCTGGGGCAAGGC  
CTACGGCGTCATCGCCGACGTCTTTATCCAGGTTCGAGGCCGACCTCTACGC  
CCAGGCCGTCGAGTGACCCGGG

The *gpd* intron sequence was highlighted in red-color font

Sequence alignment of the original and optimized VHb gene.

| Sequence alignment |                                                                                            |  |
|--------------------|--------------------------------------------------------------------------------------------|--|
| 5' Flanking        |                                                                                            |  |
| Protein            | M L D Q Q T I N I I K A T V P V L K E H G V T I T T T F Y K                                |  |
| Original 1         | ATGTTAGACCAGCAAAACATTAAACATCATCAAGCCACTGTTCCTGTATTGAAGGAGCATGGCGTTACCATTAACACGACTTTTATAAAA |  |
| Optimized          | ATGCTCGACCAGCAGACCATCAACATCATCAAGGCCACCGTCCCGTCCTCAAGGAGCACGGCGTCACCATCACCAACCTTCTACAAG    |  |
| Protein            | N L F A K H P E V R P L F D M G R Q E S L E Q P K A L A M T                                |  |
| Original 91        | AACTTGTTTCCCAAACACCTGAAGTACGTCTTTGTTTGGATATGGGTCGCCAAGAATCTTTGGAGCAGCCTAAGGCTTTGGCGATGACG  |  |
| Optimized          | AACCTCTTCGCCAAGCACCCGAGGTCCGCCCCCTCTCGACATGGGCCGCCAGGAGTCCCTCGAGCAGCCCAAGGCCCTCGCCATGACG   |  |
| Protein            | V L A A A Q N I E N L P A I L P A V K K I A V K H C Q A G V                                |  |
| Original 181       | GTATTGGCGGCAGCGCAAAACATTGAAAATTTGCCAGCTATTTTCCTGCGGTCAAAAAATTGCAGTCAAAACATTGTCAAGCAGGCGTG  |  |
| Optimized          | GTCTTCGCGGCCGCCAGAACATCGAGAACCTCCCCGCCATCCTCCCCGCGTCAAGAAGATCGCCGTCAAGCACTGCCAGGCCGGCGTC   |  |
| Protein            | A A A H Y P I V G Q E L L G A I K E V L G D A A T D D I L D                                |  |
| Original 271       | GCAGCAGCGCATTATCCGATTGTCGGTCAAGAATTGTTGGGTGCGATTAAAGAAGTATTGGGCGATGCCGCAACCGATGACATTTTGGAC |  |
| Optimized          | GCCGCCGCCACTACCCCATCGTCGGCCAGGAGCTCCTCGGCGCCATCAAGGAGGTCTCGGCACGCCGCCACCGACGACATCCTCGAC    |  |
| Protein            | A W G K A Y G V I A D V F I Q V E A D L Y A Q A V E *                                      |  |
| Original 361       | GCGTGGGGCAAGGCTTATGGCGTGATTGCAGATGTGTTTATTCAGTGGAAGCAGATTGTACGCTCAAGCGGTTGAATAA            |  |
| Optimized          | GCGTGGGGCAAGGCTTACGGCGTCATCGCCGACGTCTTTATCCAGGTTCGAGGCCGACCTCTACGCCAGGCCGTCGAGTGA          |  |
| 3' Flanking        |                                                                                            |  |
